# Supplementary material for: The Effect of Lantana camara L. extract and Nano-silver extract of Lantana against Potato Tuber Moth [Phthorimaea operculella (Zeller)]
Source: Research Square preprint supplement (doi:10.21203/rs.3.rs-7356301/v1), 2025-08-13
Supplement: Supplementary file 1 [file eab605cbd245979d4b5372ef.docx]

**HIGHLIGHTS**

-Plant extracts of *Lantana camara* are obtained natural growing area.

-In the bioassay nano-silver (AgNO3) Lantana extracts were performed green-synthesis

-Lantana camara ethanol extrats and nano-silver Lantana extracts are investigated against toxical effect on Potato Tuber Moth -*Phthorimaea operculella* (Zeller)

-AgNPs extract had larvicidal and inhibition hatching egg effects are found more effective than Lantana ethanol extract.
